# Supplementary material for: Analysis of long-range interactions in primary human cells identifies cooperative CFTR regulatory elements
Source: PubMed Central journal article supplement — Nucleic Acids Res. 2015 Nov 28;44(6):2564–76. doi: 10.1093/nar/gkv1300 (PMC4824072; doi:10.1093/nar/gkv1300), 2015-11-28
Supplement: supp_gkv1300_nar-01842-m-2015-File007.pdf [file supp_gkv1300_nar-01842-m-2015-File007.pdf]

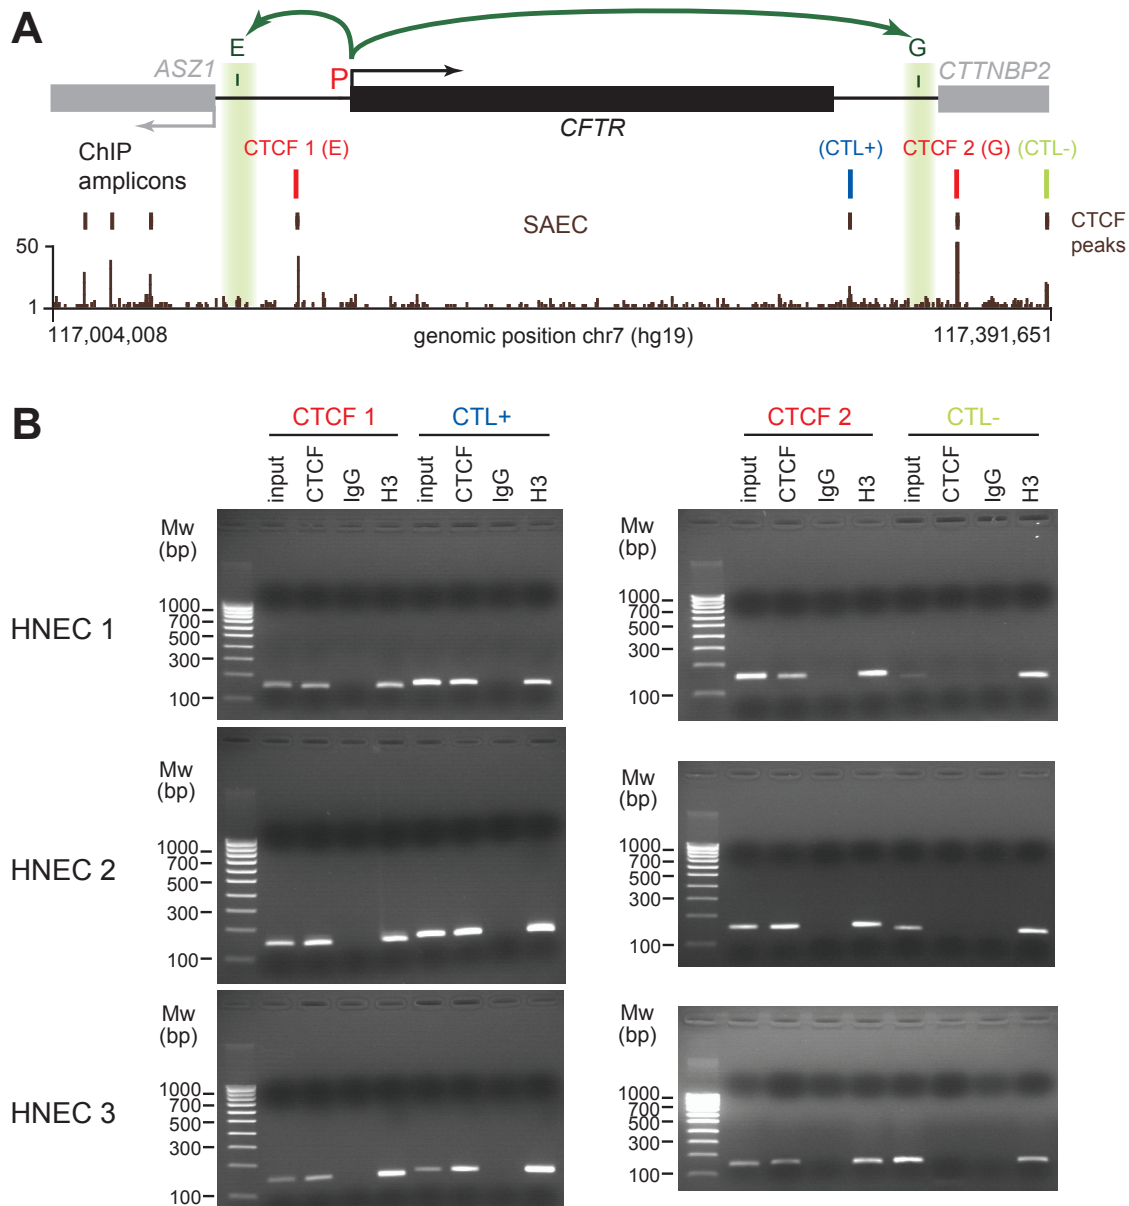

**Supplementary Figure S1.** CTCF binds to key genomic sites along the *CFTR* locus. **(A)** The position of the regions amplified by PCR after chromatin immunoprecipitation are identified below the locus and aligned against the CTCF interaction profile mapped by ChIP-seq in SAEC. **(B)** ChIP-PCR analysis of CTCF recruitment near the *CFTR* enhancer elements in HNEC cells. Three independent ChIP assays were performed on crosslinked chromatin of HNEC cells using a CTCF specific antibody, a negative control IgG antibody or a positive control Histone H3 antibody. Immunoprecipitated DNA fragments were amplified by PCR with primers specific for the CTCF binding regions conserved across cell lines close to elements E and G, respectively CTCF 1 (E) and CTCF 2 (G). The ChIP PCR performed with primers against the positive control CTL+ was already described (69). A region where CTCF does not bind was included as a negative control (CTL-). PCR products were resolved on a 2% agarose gel and stained with ethidium bromide with input DNA (representing 2% of immunoprecipitated material) as control for loading.
